# Supplementary material
Source: PubMed Central journal article supplement (PMC7642329)
Supplement: 41396_2020_686_MOESM1_ESM.pdf [file 41396_2020_686_MOESM1_ESM.pdf]

# Ecological succession in the vaginal microbiota during pregnancy and birth - *Supplementary material*

Rasmussen, M.A.<sup>1+2</sup>§, Thorsen, J.<sup>1+3</sup>§, Dominguez-Bello, M.G.<sup>4</sup>, Blaser, M. J.<sup>5+6</sup>, Mortensen, M.S.<sup>7</sup>, Brejnrod, A.D.<sup>3+7</sup> Shah, S.A.<sup>1</sup>, Hjelmsoe, M.H.<sup>1</sup>, Lehtimäki, J.<sup>1</sup>, Trivedi, U.<sup>7</sup>, Bisgaard H.<sup>1</sup>, Sørensen S.J.<sup>7#</sup>, Stokholm J.<sup>1#</sup>

## **Affiliation:**

- 1) COPSAC, Copenhagen Prospective Studies on Asthma in Childhood, Herlev and Gentofte Hospital, University of Copenhagen, Copenhagen, Denmark
- 2) Section of Chemometrics and Analytical Technologies, Department of Food Science, University of Copenhagen, Rolighedsvej 26, 1958 Frederiksberg C, Denmark
- 3) Novo Nordisk Foundation Center for Basic Metabolic Research, University of Copenhagen, 2100 Copenhagen, Denmark
- 4) Department of Biochemistry and Microbiology, Rutgers University, New Brunswick, NJ, USA
- 5) Departments of Medicine and Microbiology, and the Human Microbiome Program, New York University Langone Medical Center, New York, USA.
- 6) Center for Advanced Biotechnology and Medicine, Rutgers University, New Brunswick, NJ, USA
- 7) Section of Microbiology, Department of Biology, University of Copenhagen, 2100 Copenhagen, Denmark

§Contributed equally, #Contributed equally

**Table S1** - Baseline characteristics for women participating in the study. Numbers in table refer to either N (%) or mean (SD), depending on the variable. P-values correspond to Chi-square test (categorical variables) or t-tests (continuous variables).

|                                             | <b>Included</b> | <b>Remaining</b> | <b>p-value</b> |
|---------------------------------------------|-----------------|------------------|----------------|
|                                             | 57              | 681              |                |
| Cesarean section, N (%)                     | 6 (10.9)        | 144 (22.5)       | 0.067          |
| Hospitalized at birth, N (%)                | 4 ( 7.3)        | 74 (11.6)        | 0.598          |
| Non-caucasian, N (%)                        | 2 ( 3.6)        | 27 ( 4.2)        | 1.000          |
| Smoking in pregnancy, N (%)                 | 7 (12.7)        | 47 ( 7.3)        | 0.242          |
| Preeclampsia, N (%)                         | 3 ( 5.5)        | 27 ( 4.2)        | 0.933          |
| Gestational diabetes, N (%)                 | 0 ( 0.0)        | 16 ( 2.5)        | 0.471          |
| Intrapartum antibiotics, N (%)              | 13 (23.6)       | 209 (32.8)       | 0.212          |
| Nulliparity, N (%)                          | 22 (40.0)       | 297 (46.4)       | 0.439          |
| Male child, N (%)                           | 30 (54.5)       | 326 (50.9)       | 0.709          |
| Birth season, N (%)                         |                 |                  | <0.001         |
| Winter                                      | 12 (21.8)       | 201 (31.4)       |                |
| Spring                                      | 0 ( 0.0)        | 185 (28.9)       |                |
| Summer                                      | 7 (12.7)        | 141 (22.0)       |                |
| Fall                                        | 36 (65.5)       | 113 (17.7)       |                |
| Maternal age at birth, mean (SD), years     | 32.46 (4.24)    | 32.26 (4.37)     | 0.750          |
| Gestational age, mean (SD), weeks           | 40.20 (1.10)    | 39.85 (1.67)     | 0.127          |
| Antibiotics in pregnancy, N (%)             | 25 (45.5)       | 228 (35.7)       | 0.194          |
| Household annual income, N (%)              |                 |                  | 0.137          |
| Low (below 50.000 Euro)                     | 1 ( 1.8)        | 66 (10.3)        |                |
| Medium (50.000 – 110.000 Euro)              | 28 (50.9)       | 340 (53.1)       |                |
| High (above 110.000 Euro)                   | 26 (47.3)       | 233 (36.4)       |                |
| Maternal educational level, N (%)           |                 |                  | 0.979          |
| Low (elementary school or college graduate) | 4 ( 7.3)        | 51 ( 8.0)        |                |
| Medium (tradesman or medium length)         | 36 (65.5)       | 412 (64.4)       |                |
| High (master's degree)                      | 15 (27.3)       | 177 (27.7)       |                |

**Table S2** - Wetlab protocol (N) for the five sample types on lot number of extraction kit and extraction tray.

| Lot number Extraction Kit | PH13 C27 | PM13A 29 | PM13A 30 | PM13 C27 |    |    |    |    | PM13 H15 |    |    |    |
|---------------------------|----------|----------|----------|----------|----|----|----|----|----------|----|----|----|
|                           |          |          |          | 49       | 50 | 51 | 34 | 32 | 56       | 57 | 58 | 59 |
| Extraction tray           | 33       | 19       | 18       | 49       | 50 | 51 | 34 | 32 | 56       | 57 | 58 | 59 |
| Fecal w1                  | 29       |          |          |          |    |    | 1  | 9  |          |    |    |    |
| Trach w1                  |          | 24       | 24       |          |    |    |    |    |          |    |    |    |
| Vaginal w24               |          |          |          | 12       | 39 | 5  |    |    |          |    |    |    |
| Vaginal w36               |          |          |          |          |    |    |    |    | 2        | 44 | 11 |    |
| Vaginal birth             |          |          |          |          |    |    |    |    |          |    |    | 57 |

**Table S3** - Sequencing run and the five sample types (N).

| Sequencing Run | Sr1 | Sr2 | Sr3 | Sr4 | Sr5 | Sr6 | Sr7 | Sr8 | Sr9 | Sr10 | Sr11 |
|----------------|-----|-----|-----|-----|-----|-----|-----|-----|-----|------|------|
| Fecal w1       |     | 9   |     |     |     | 23  | 7   |     |     |      |      |
| Trach w1       | 24  |     |     |     | 8   |     |     |     |     | 16   |      |
| Vaginal w24    |     |     | 39  |     | 7   |     |     |     | 3   |      | 7    |
| Vaginal w36    |     |     |     | 44  | 2   |     |     | 11  |     |      |      |
| Vaginal birth  |     |     |     | 57  |     |     |     |     |     |      |      |

**Table S4** - Summary statistics (median (25% quartile; 75% quartile)) for compartment and sampling time point. *N* = number of samples, library size = number of reads, #OTUs = number of observed OTUs, PD = Faith's Phylogenetic Diversity, Shannon = Shannon diversity.

|                      | <b>N</b> | <b>library size</b> | <b>#OTUs</b>  | <b>PD</b>        | <b>Shannon</b>   |
|----------------------|----------|---------------------|---------------|------------------|------------------|
| <b>Fecal w1</b>      | 39       | 48764 (17513;82239) | 134 (116;210) | 7.00 (5.53;8.45) | 1.84 (1.46;2.24) |
| <b>Trach w1</b>      | 48       | 30948 (19896;53692) | 67 (52;83)    | 4.34 (3.43;5.68) | 1.56 (1.09;1.91) |
| <b>Vaginal w24</b>   | 56       | 52900 (38058;65348) | 92 (76;122)   | 6.10 (5.19;7.79) | 0.79 (0.49;1.66) |
| <b>Vaginal w36</b>   | 57       | 41270 (27535;59467) | 85 (62;118)   | 5.90 (4.41;7.91) | 1.40 (0.60;1.70) |
| <b>Vaginal birth</b> | 57       | 39708 (32062;49646) | 117 (87;137)  | 8.59 (5.99;12.8) | 1.31 (0.85;1.80) |

**Table S5** - Unique OTUs found in vaginal birth samples, but not in pregnancy week 24 or 36 samples (OTUs identified in  $\geq 5$  samples).

| <b>Taxa name</b>               | <b>Positive (N)</b> | <b>Mean relative abundance</b> | <b>Reads (N)</b> |
|--------------------------------|---------------------|--------------------------------|------------------|
| Streptococcus_OTU6228          | 14                  | 0.0021                         | 81               |
| Moraxella_OTU4678              | 13                  | 0.0007                         | 28               |
| Kingdom_Bacteria_OTU553        | 12                  | 0.0069                         | 245              |
| Moraxella_OTU3511              | 11                  | 0.0004                         | 14               |
| Streptococcus_OTU6224          | 10                  | 0.0009                         | 33               |
| Moraxella_OTU4650              | 8                   | 0.0004                         | 16               |
| Streptococcus_OTU5596          | 7                   | 0.0046                         | 186              |
| Order_Bacillales_OTU3316       | 7                   | 0.0027                         | 121              |
| Family_Chitinophagaceae_OTU990 | 7                   | 0.0014                         | 64               |
| Class_Bacilli_OTU4895          | 5                   | 0.0009                         | 38               |
| Moraxella_OTU6681              | 5                   | 0.0003                         | 9                |

**Table S6** - Association between major clinical variables and the vaginal microbiota at birth, quantified as **A**) Alpha diversity (Shannon index, linear models), **B**) Beta diversity (unweighted and weighted UniFrac) and **C**) Differential abundance tests of the top 15 most abundant taxa vs. gestational age (spearman correlation test) and any antibiotics administered during birth or in the third trimester (Kruskal-Wallis test). The only significant findings were associations between gestational age at birth and the two closely related taxa *Enterococcus* and *Granulicatella* (Between-taxa relative abundance spearman correlation 0.78,  $p = 1.24e-12$ ).  $q$  values are calculated using False Discovery Rate (*fdr*) control.

### S6A

| Clinical information                            | estimate | std.error | conf.low | conf.high | p.value | q.value |
|-------------------------------------------------|----------|-----------|----------|-----------|---------|---------|
| Antibiotics during pregnancy                    | 0.11     | 0.19      | -0.27    | 0.49      | 0.57    | 0.85    |
| Antibiotics during third trimester of pregnancy | 0.05     | 0.23      | -0.41    | 0.50      | 0.84    | 0.86    |
| Antibiotics during birth (mother)               | -0.04    | 0.22      | -0.48    | 0.40      | 0.86    | 0.86    |
| Season of birth                                 | 0.01     | 0.08      | -0.14    | 0.17      | 0.86    | 0.86    |
| Maternal age at birth                           | 0.06     | 0.02      | 0.02     | 0.10      | 0.01    | 0.06    |
| Older children in the home                      | -0.14    | 0.19      | -0.52    | 0.25      | 0.48    | 0.85    |
| Preeclampsia                                    | -0.90    | 0.40      | -1.69    | -0.10     | 0.03    | 0.13    |
| Gestational age at birth                        | 0.06     | 0.09      | -0.12    | 0.23      | 0.52    | 0.85    |

### S6B

| Clinical information                            | Metric   | F stat | R <sup>2</sup> | p.value |
|-------------------------------------------------|----------|--------|----------------|---------|
| Preeclampsia                                    | UniFrac  | 0.66   | 0.012          | 0.89    |
| Maternal age at birth                           | UniFrac  | 0.52   | 0.010          | 0.96    |
| Older children in the home                      | UniFrac  | 1.51   | 0.028          | 0.11    |
| Season of birth                                 | UniFrac  | 1.35   | 0.025          | 0.15    |
| Antibiotics during birth (mother)               | UniFrac  | 0.77   | 0.014          | 0.68    |
| Antibiotics during pregnancy                    | UniFrac  | 0.75   | 0.014          | 0.69    |
| Antibiotics during third trimester of pregnancy | UniFrac  | 1.33   | 0.025          | 0.17    |
| Gestational age at birth                        | UniFrac  | 1.06   | 0.020          | 0.33    |
| Preeclampsia                                    | wUniFrac | 0.65   | 0.012          | 0.67    |
| Maternal age at birth                           | wUniFrac | 1.21   | 0.022          | 0.26    |
| Older children in the home                      | wUniFrac | 1.13   | 0.021          | 0.28    |
| Season of birth                                 | wUniFrac | 0.34   | 0.006          | 0.94    |
| Antibiotics during birth (mother)               | wUniFrac | 0.55   | 0.010          | 0.75    |
| Antibiotics during pregnancy                    | wUniFrac | 0.51   | 0.009          | 0.79    |
| Antibiotics during third trimester of pregnancy | wUniFrac | 0.38   | 0.007          | 0.91    |
| Gestational age at birth                        | wUniFrac | 0.57   | 0.011          | 0.70    |

## S6C

| Clinical information                            | Genus                     | Method*         | estimate    | p.value       | q.value     |
|-------------------------------------------------|---------------------------|-----------------|-------------|---------------|-------------|
| Antibiotics during birth (mother)               | Acinetobacter             | KW              |             | 0.94          | 0.94        |
| Antibiotics during birth (mother)               | Atopobium                 | KW              |             | 0.44          | 0.93        |
| Antibiotics during birth (mother)               | Enterococcus              | KW              |             | 0.74          | 0.93        |
| Antibiotics during birth (mother)               | Family_Enterobacteriaceae | KW              |             | 0.94          | 0.94        |
| Antibiotics during birth (mother)               | Gardnerella               | KW              |             | 0.57          | 0.93        |
| Antibiotics during birth (mother)               | Granulicatella            | KW              |             | 0.33          | 0.93        |
| Antibiotics during birth (mother)               | Lactobacillus             | KW              |             | 0.51          | 0.93        |
| Antibiotics during birth (mother)               | Moraxella                 | KW              |             | 0.86          | 0.94        |
| Antibiotics during birth (mother)               | Order_Clostridiales       | KW              |             | 0.13          | 0.93        |
| Antibiotics during birth (mother)               | Prevotella                | KW              |             | 0.19          | 0.93        |
| Antibiotics during birth (mother)               | Saccharofermentans        | KW              |             | 0.57          | 0.93        |
| Antibiotics during birth (mother)               | Sneathia                  | KW              |             | 0.17          | 0.93        |
| Antibiotics during birth (mother)               | Staphylococcus            | KW              |             | 0.20          | 0.93        |
| Antibiotics during birth (mother)               | Streptococcus             | KW              |             | 0.74          | 0.93        |
| Antibiotics during birth (mother)               | Veillonella               | KW              |             | 0.67          | 0.93        |
| Antibiotics during third trimester of pregnancy | Acinetobacter             | KW              |             | 0.50          | 0.93        |
| Antibiotics during third trimester of pregnancy | Atopobium                 | KW              |             | 0.38          | 0.93        |
| Antibiotics during third trimester of pregnancy | Enterococcus              | KW              |             | 0.48          | 0.93        |
| Antibiotics during third trimester of pregnancy | Family_Enterobacteriaceae | KW              |             | 0.55          | 0.93        |
| Antibiotics during third trimester of pregnancy | Gardnerella               | KW              |             | 0.78          | 0.93        |
| Antibiotics during third trimester of pregnancy | Granulicatella            | KW              |             | 0.81          | 0.94        |
| Antibiotics during third trimester of pregnancy | Lactobacillus             | KW              |             | 0.70          | 0.93        |
| Antibiotics during third trimester of pregnancy | Moraxella                 | KW              |             | 0.61          | 0.93        |
| Antibiotics during third trimester of pregnancy | Order_Clostridiales       | KW              |             | 0.85          | 0.94        |
| Antibiotics during third trimester of pregnancy | Prevotella                | KW              |             | 0.51          | 0.93        |
| Antibiotics during third trimester of pregnancy | Saccharofermentans        | KW              |             | 0.76          | 0.93        |
| Antibiotics during third trimester of pregnancy | Sneathia                  | KW              |             | 0.60          | 0.93        |
| Antibiotics during third trimester of pregnancy | Staphylococcus            | KW              |             | 0.40          | 0.93        |
| Antibiotics during third trimester of pregnancy | Streptococcus             | KW              |             | 0.89          | 0.94        |
| Antibiotics during third trimester of pregnancy | Veillonella               | KW              |             | 0.01          | 0.22        |
| Gestational age at birth                        | Acinetobacter             | Spearman        | 0.07        | 0.63          | 0.93        |
| Gestational age at birth                        | Atopobium                 | Spearman        | -0.08       | 0.56          | 0.93        |
| <b>Gestational age at birth</b>                 | <b>Enterococcus</b>       | <b>Spearman</b> | <b>0.48</b> | <b>0.0002</b> | <b>0.01</b> |
| Gestational age at birth                        | Family_Enterobacteriaceae | Spearman        | 0.09        | 0.52          | 0.93        |
| Gestational age at birth                        | Gardnerella               | Spearman        | 0.14        | 0.30          | 0.93        |
| <b>Gestational age at birth</b>                 | <b>Granulicatella</b>     | <b>Spearman</b> | <b>0.45</b> | <b>0.0005</b> | <b>0.01</b> |
| Gestational age at birth                        | Lactobacillus             | Spearman        | -0.24       | 0.07          | 0.83        |
| Gestational age at birth                        | Moraxella                 | Spearman        | -0.08       | 0.56          | 0.93        |
| Gestational age at birth                        | Order_Clostridiales       | Spearman        | -0.14       | 0.32          | 0.93        |
| Gestational age at birth                        | Prevotella                | Spearman        | -0.14       | 0.30          | 0.93        |
| Gestational age at birth                        | Saccharofermentans        | Spearman        | -0.06       | 0.65          | 0.93        |
| Gestational age at birth                        | Sneathia                  | Spearman        | 0.07        | 0.60          | 0.93        |
| Gestational age at birth                        | Staphylococcus            | Spearman        | 0.05        | 0.72          | 0.93        |
| Gestational age at birth                        | Streptococcus             | Spearman        | -0.04       | 0.78          | 0.93        |
| Gestational age at birth                        | Veillonella               | Spearman        | 0.02        | 0.90          | 0.94        |

\* KW = Kruskal-Wallis rank sum test, Spearman = Spearman's rank correlation rho

**Table S7** – Sensitivity analysis of vaginal development during pregnancy to birth with respect to sequencing run as well as extraction kit. Top 10 most abundant and top 10 most present taxa On genus level, as well as the diversity measures PCo1, PD and Shannon. “All” refers to all women with data from three timepoints, whereas “Single seq run” refers to paired samples from pregnancy week 36 and birth from 44 women from sequencing run 4 (Sr4), and “Single extraction kit lot” refers to all samples but only from pregnancy week 36 and birth from from extraction kit lot **PM13H15**. *n* indicates the number of samples for this analysis. Reported is *p* values based on Kruskal Wallis test for difference between timepoints. **Mean RA** refers to the mean relative abundance within the vaginal samples.

| Genus                            | Mean RA | All<br>(n = 3 x 56) | PM13H15<br>(n = 2 x 57) | SR_4<br>(n = 2 x 44) |
|----------------------------------|---------|---------------------|-------------------------|----------------------|
| <b>Atopobiu</b>                  | 0.012   | 0.692               | 0.436                   | 0.966                |
| <b>Dialister</b>                 | 0.004   | 0.289               | 0.105                   | 0.200                |
| <b>Enterococcus</b>              | 0.039   | <0.001              | <0.001                  | 0.002                |
| <b>Family_Enterobacteriaceae</b> | 0.027   | 0.037               | 0.011                   | 0.026                |
| <b>Family_Lactobacillaceae</b>   | 0.0005  | 0.544               | 0.871                   | 0.590                |
| <b>Gardnerella</b>               | 0.067   | 0.160               | 0.131                   | 0.246                |
| <b>Lactobacillus</b>             | 0.70    | <0.001              | <0.001                  | 0.004                |
| <b>Moraxella</b>                 | 0.016   | <0.001              | <0.001                  | <0.001               |
| <b>Order_Lactobacillales</b>     | 0.0046  | 0.497               | 0.803                   | 0.835                |
| <b>Prevotella</b>                | 0.012   | 0.908               | 0.648                   | 0.652                |
| <b>Sneathia</b>                  | 0.013   | 0.086               | 0.836                   | 0.343                |
| <b>Staphylococcus</b>            | 0.017   | <0.001              | <0.001                  | <0.001               |
| <b>Streptococcus</b>             | 0.014   | <0.001              | <0.001                  | <0.001               |
| <b>PCo1 (unifrac)</b>            |         | <0.001              | <0.001                  | <0.001               |
| <b>PD</b>                        |         | <0.001              | <0.001                  | 0.001                |
| <b>Shannon</b>                   |         | 0.011               | 0.406                   | 0.350                |

**Table S8** - Weighted transfer Ratios (WR) from vaginal birth microbiome to fecal- and airway microbiome age one week, based on all data as well as rarefied to lowest common depth (2325 reads per sample). *notu* = number of test-able otus for each analysis, *pv* = permutation *p*-value for WR statistics (999 permutations).

| Compartment   | rarefy | notu | WR   | pv    |
|---------------|--------|------|------|-------|
| <b>Fecal</b>  | No     | 536  | 2.69 | 0.036 |
| <b>Fecal</b>  | Yes    | 222  | 6.03 | 0.004 |
| <b>Airway</b> | No     | 346  | 2.25 | 0.003 |
| <b>Airway</b> | Yes    | 156  | 3.72 | 0.001 |

**Table S9** – Beta-diversity comparison between vaginal microbiotas at birth and 1-week fecal and 1-week airway in children born by vaginal delivery. P values and distances of matching and non-matching mother-child pairs are computed by random permutation (n = 999)

|                              |                 | Fecal (dyads, n = 36) |       |        |       |         | Airway (dyads, n = 45) |       |        |       |         |
|------------------------------|-----------------|-----------------------|-------|--------|-------|---------|------------------------|-------|--------|-------|---------|
|                              | Metric          | Distance              |       |        |       |         | Distance               |       |        |       |         |
|                              |                 | Dyad                  |       | Random |       |         | Dyad                   |       | Random |       |         |
|                              |                 | mean                  | SD    | mean   | SD    | p-value | mean                   | SD    | mean   | SD    | p-value |
| <b>Absence/<br/>presence</b> | <b>Jaccard</b>  | 0.982                 | 0.039 | 0.990  | 0.025 | 0.076   | 0.955                  | 0.094 | 0.966  | 0.077 | 0.110   |
|                              | <b>Binomial</b> | 176                   | 68    | 179    | 71    | 0.028   | 107                    | 38    | 109    | 38    | 0.018   |
|                              | <b>Binary</b>   | 0.902                 | 0.041 | 0.910  | 0.034 | 0.015   | 0.836                  | 0.063 | 0.845  | 0.056 | 0.004   |
| <b>Abundance</b>             | <b>Bray</b>     | 0.968                 | 0.069 | 0.982  | 0.042 | 0.058   | 0.926                  | 0.136 | 0.942  | 0.114 | 0.085   |
|                              | <b>JSD</b>      | 0.649                 | 0.071 | 0.664  | 0.045 | 0.024   | 0.594                  | 0.144 | 0.617  | 0.115 | 0.006   |
| <b>Phylogeny</b>             | <b>UniFrac</b>  | 0.810                 | 0.062 | 0.813  | 0.062 | 0.180   | 0.768                  | 0.105 | 0.775  | 0.097 | 0.220   |
|                              | <b>wUniFrac</b> | 0.612                 | 0.089 | 0.617  | 0.090 | 0.262   | 0.425                  | 0.156 | 0.449  | 0.157 | 0.031   |



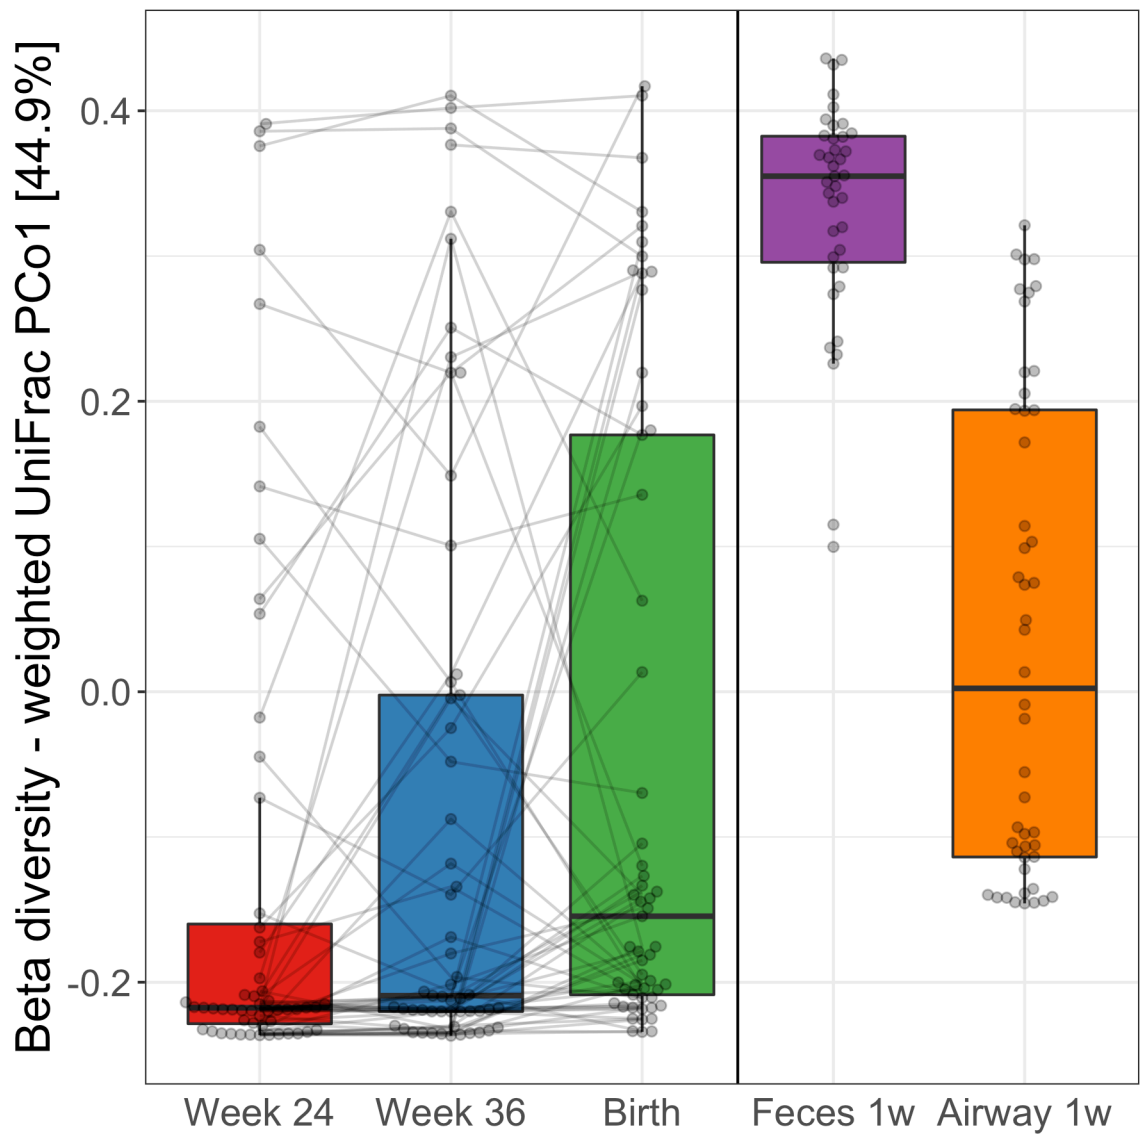

**Figure S1** – Principal Coordinate 1 of weighted UniFrac distances show a development towards a more fecal like composition towards the end of pregnancy and during birth, a similar trend to the unweighted UniFrac ordination used in Figure 2C.

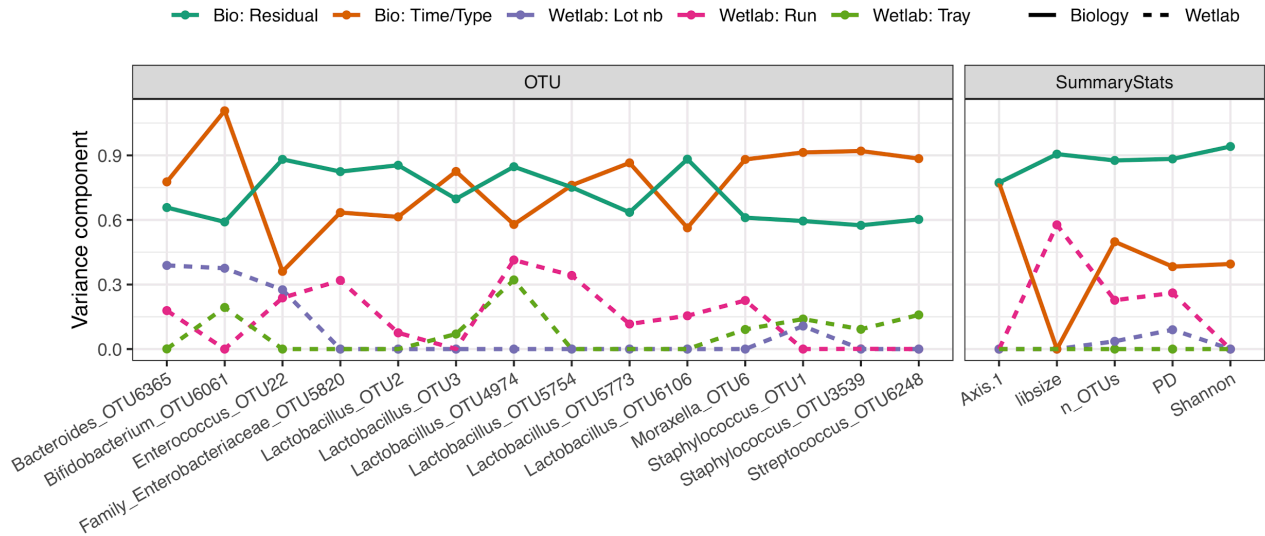

**Figure S2** - Variance distribution - in terms of standard deviations - of biological sources: Pregnancy week, child age and compartment (Bio: Time/Type) and residual (Bio: Residual), and wetlab sources: Lot number of Extraction Kit (Wetlab: Lot nb), Extraction tray (Wetlab: Tray) and Sequencing Run (Wetlab: Run), on the top 10 most abundant- and top 10 most present OTUs, and summary stats by first four axis of PCoA on weighted unifracs beta diversity, library size (libsize), number of OTUs present (n\_OTUs), Faith's Phylogenetic Diversity (PD) and Shannon diversity (Shannon).

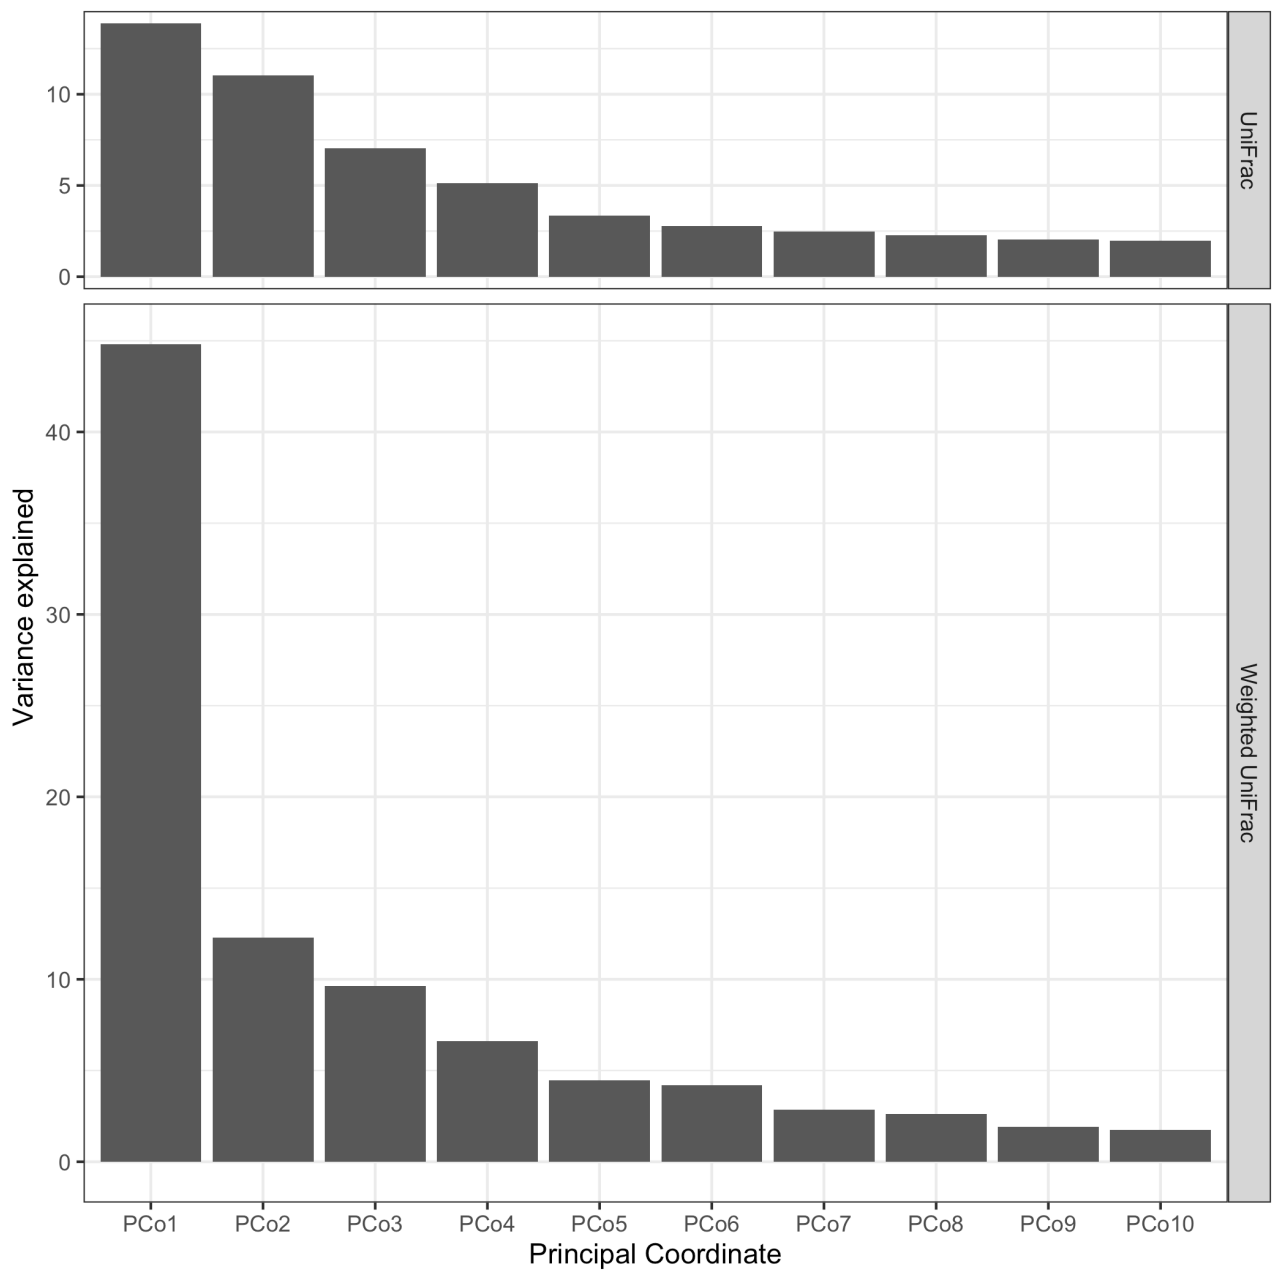

**Figure S3** – Scree plot of variance explained in UniFrac and weighted UniFrac ordinations on all samples, respectively.

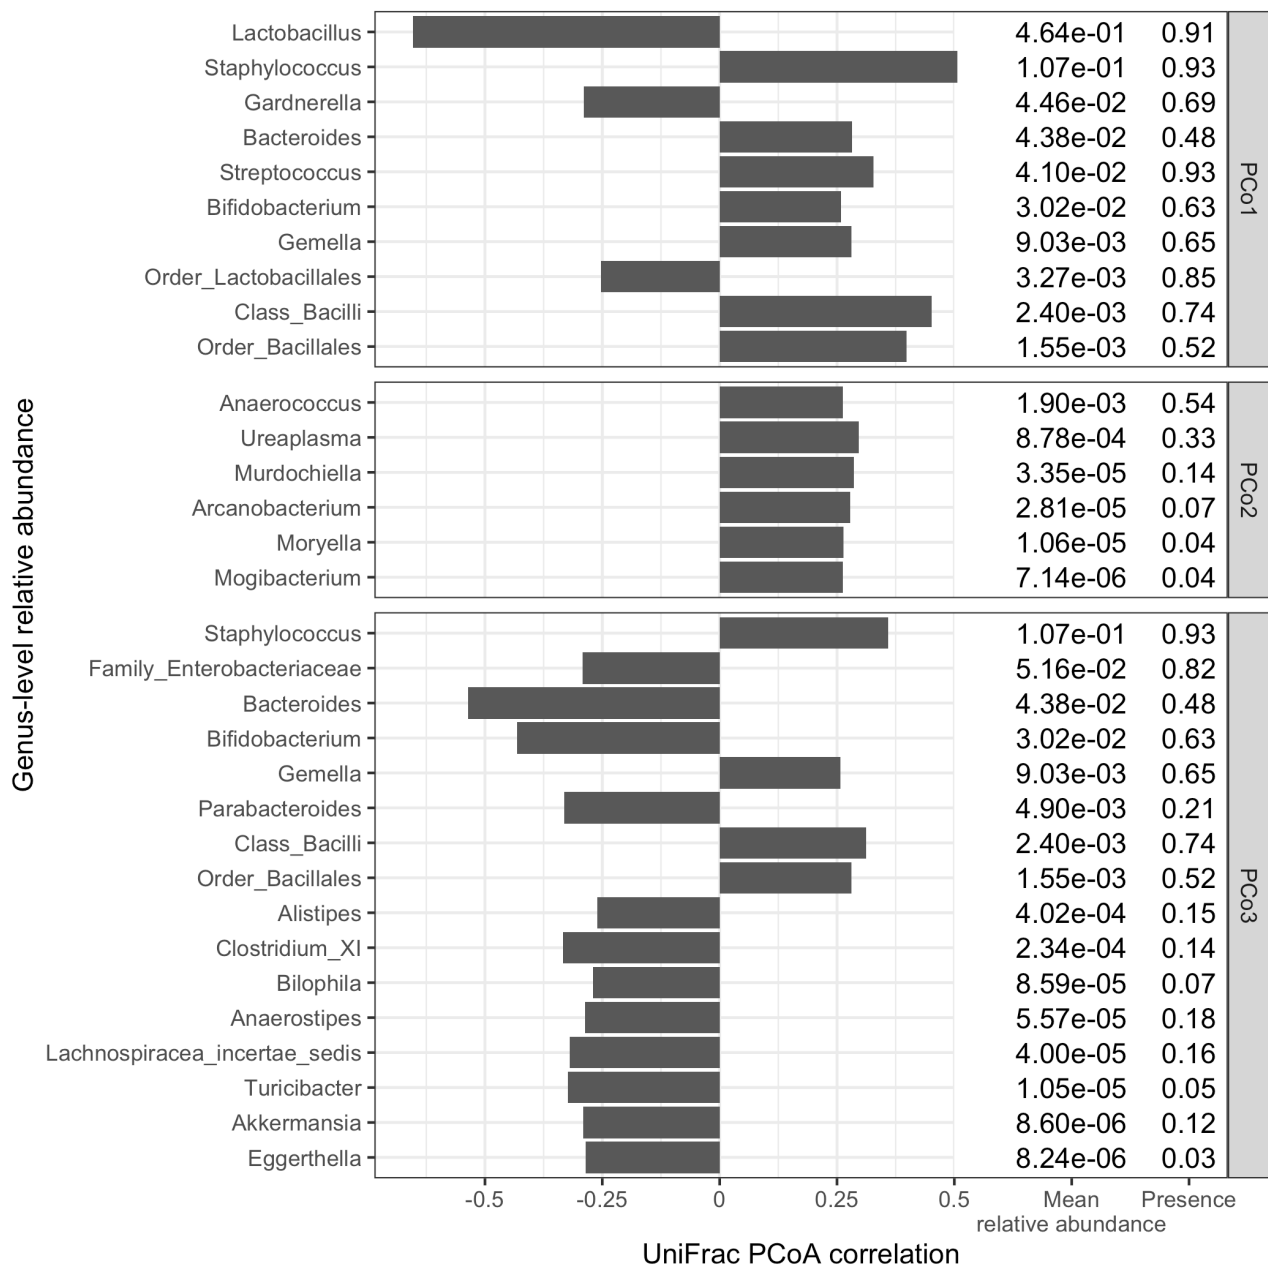

**Figure S4** – Post-hoc correlations between UniFrac Principal Coordinates 1-3 and genus-level relative abundances. Only values above 0.25 or below -0.25 are shown.

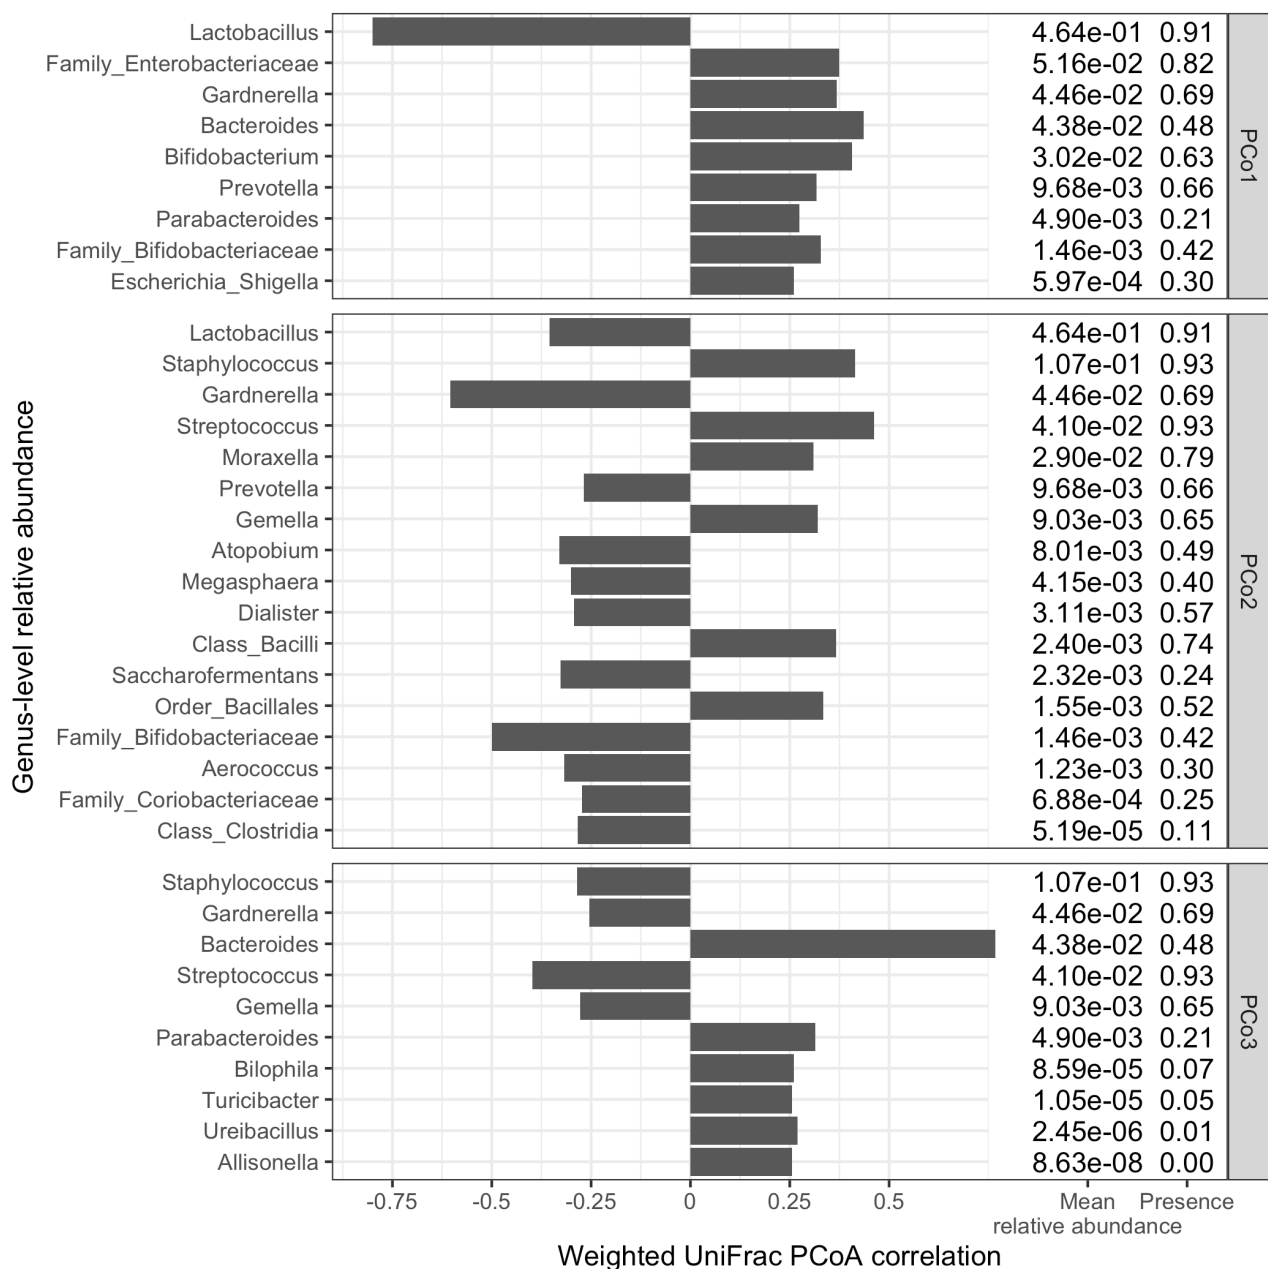

**Figure S5** – Post-hoc correlations between weighted UniFrac Principal Coordinates 1-3 and genus-level relative abundances. Only values above 0.25 or below -0.25 are shown.

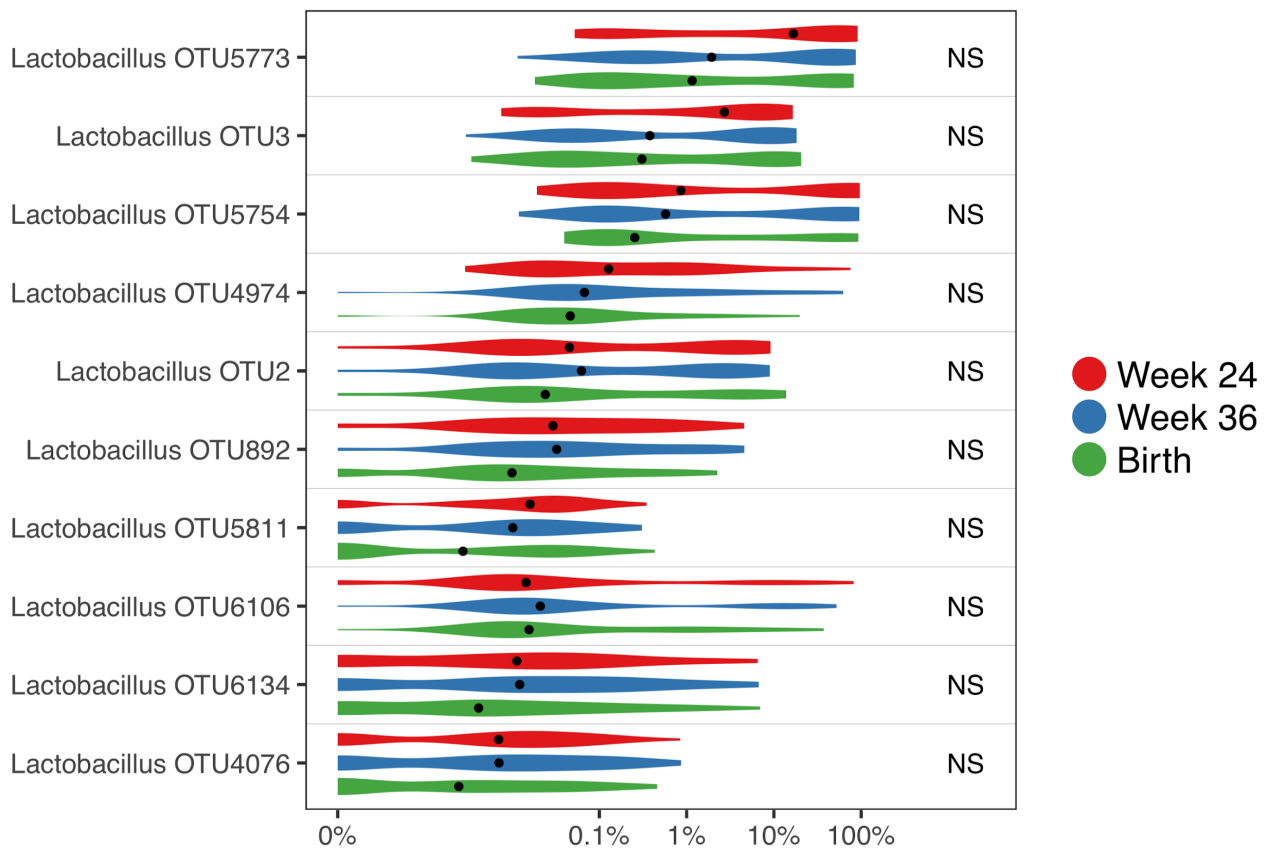

**Figure S6** - Relative abundance of the top ten dominating *Lactobacillus* OTUs tested for change during pregnancy.

*Streptococcus*

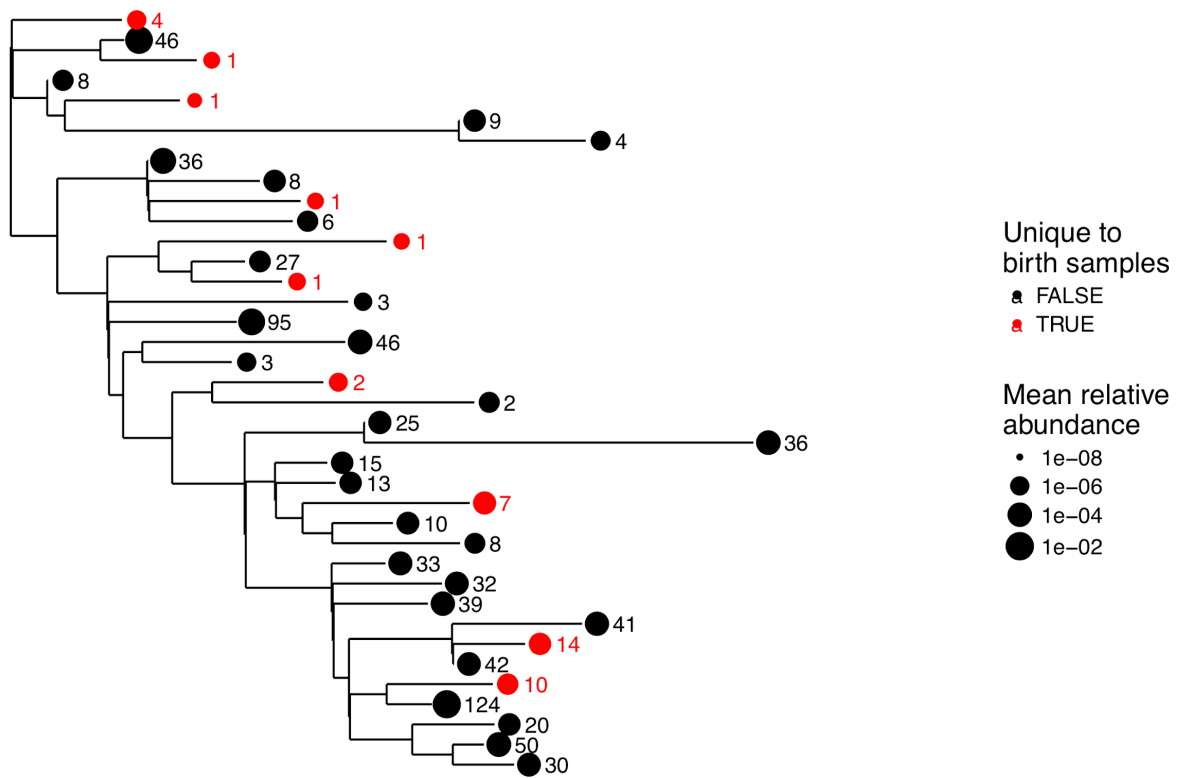

**Figure S7** - Phylogenetic placement of 37 *Streptococcus* OTUs highlighting the 10 observed only in the vaginal samples at birth after rupture of membranes. Labels on nodes indicate number of positive samples.

*Moraxella*

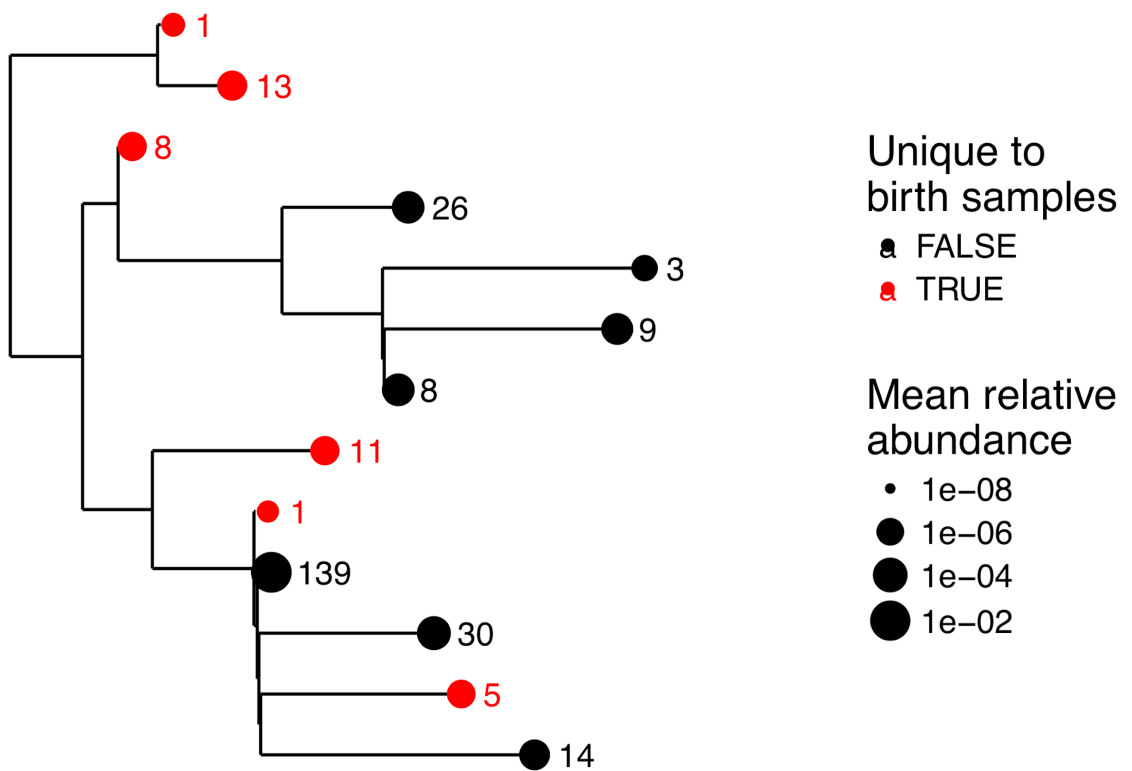

**Figure S8** - Phylogenetic placement of 13 *Moraxella* OTUs highlighting the 6 observed only in the vaginal samples at birth after rupture of membranes including a unique new branch. Labels on nodes indicate number of positive samples.



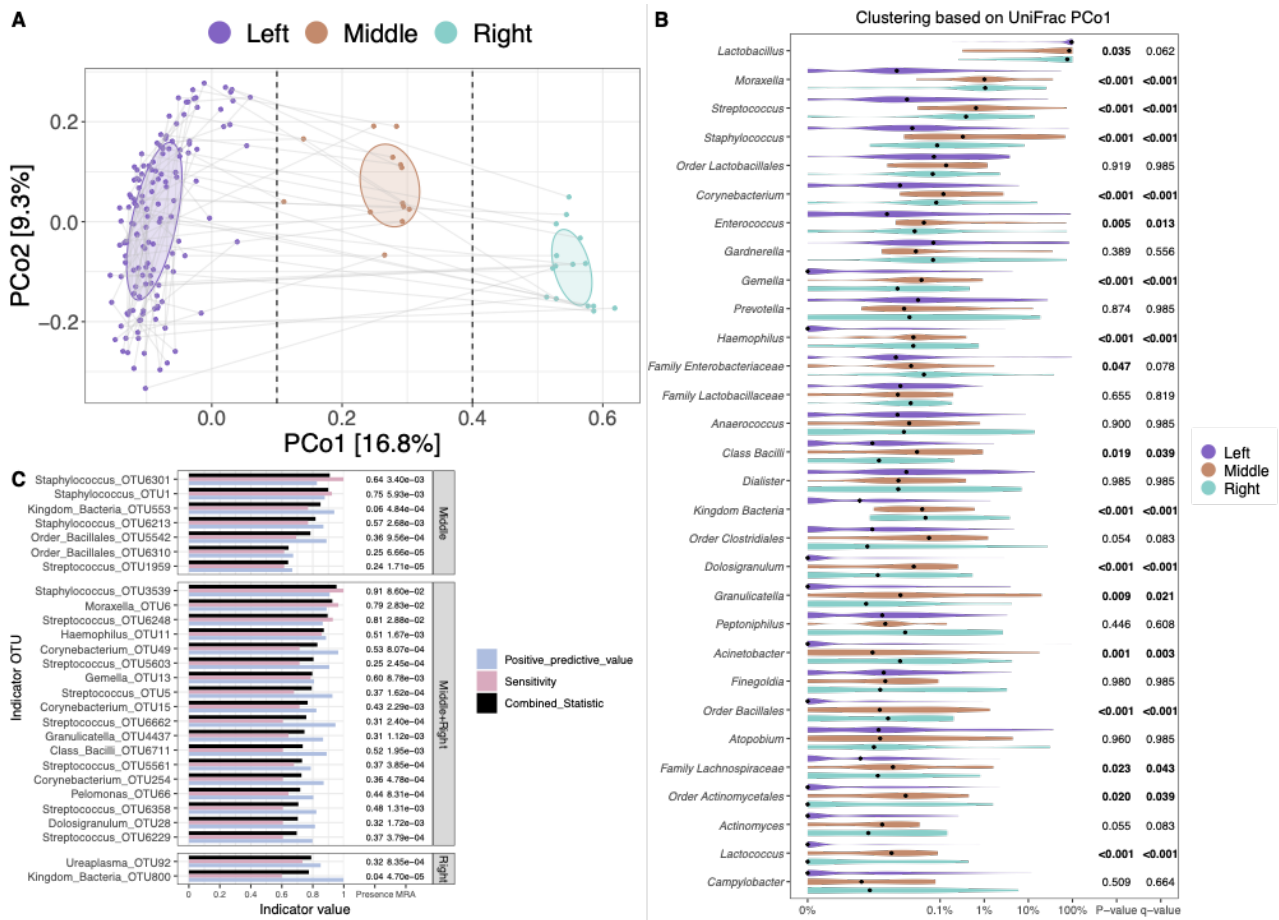

**Figure S9** - Subanalysis of Figure 4 examining the apparent grouping structure on PCo1. **A)** Only birth samples are in the middle and right clusters, delineated manually on PCo1, whereas the left cluster contains samples from all three timepoints. A decrease in the dominant *Lactobacillus* genus makes way for a relative increase in a large range of other taxa (**B**), with significant shifts as calculated by Kruskal-Wallis tests, with some taxa acting as sensitive and specific markers for the two other clusters or their combination compared to the left cluster (**C**), as calculated by the *multipatt* function from the R-package *indicspecies*.

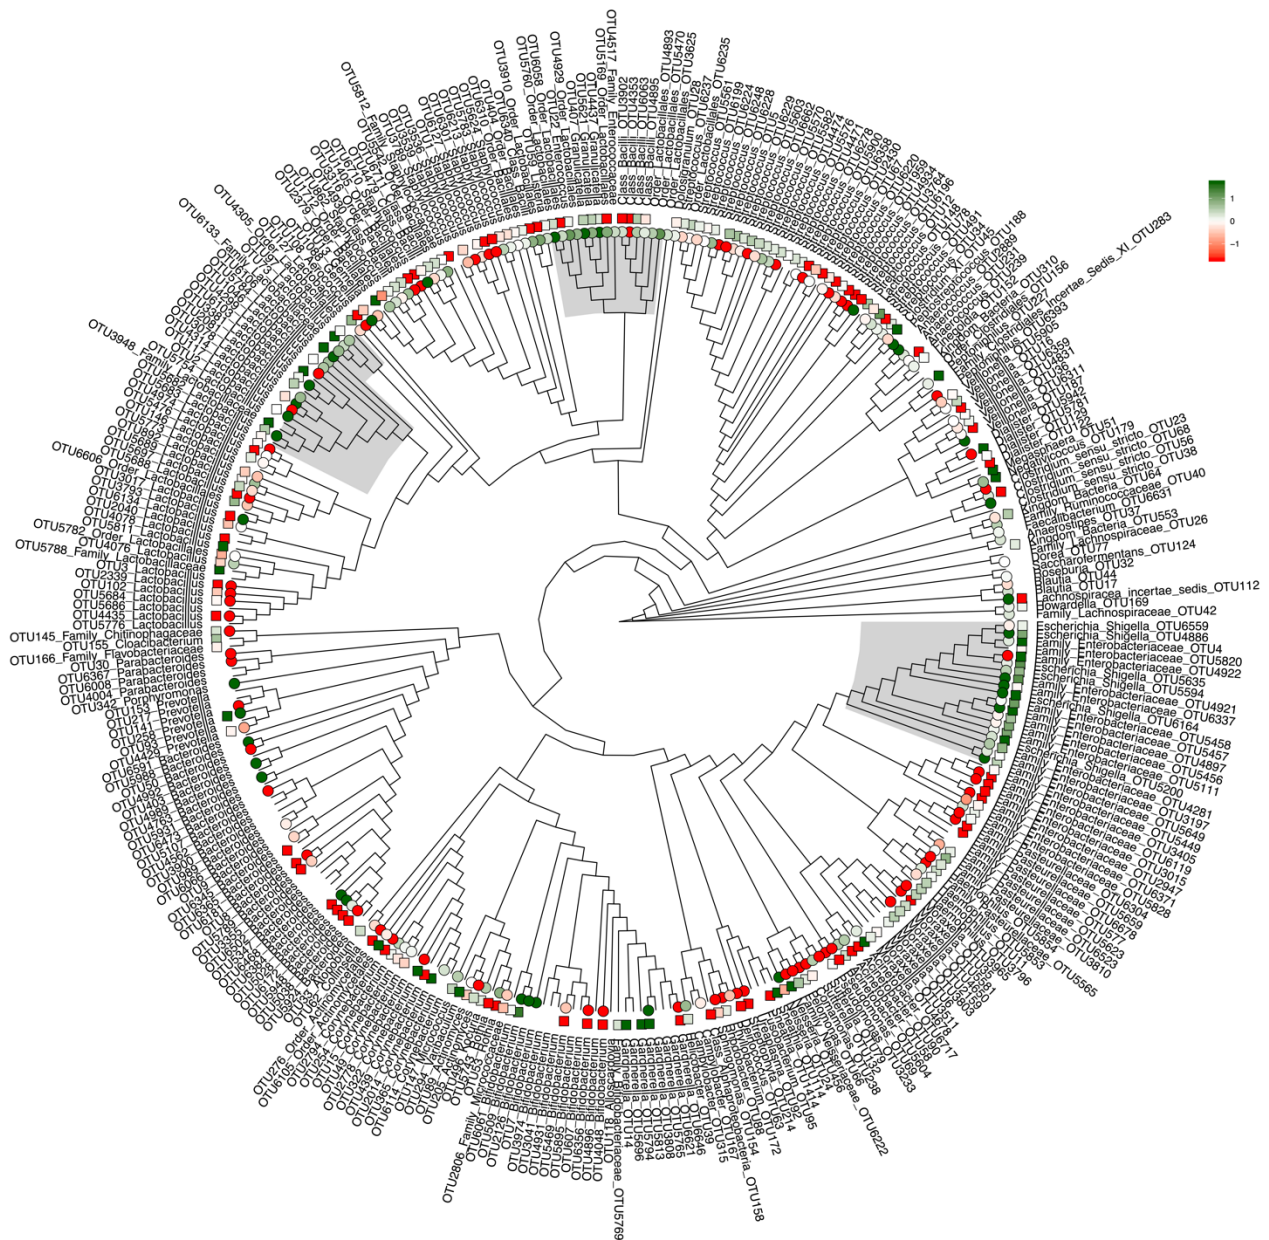

**Figure S10** - Phylogenetic tree of the 325 overall most common OTUs (present in more than 10% of the birth, fecal and airways sample). Odds ratios for vertical transfer from vagina to 1-week gut (circles) and airways (squares) for testable OTUs are inferred with color (green = positive odds, red = negative odds, log<sub>10</sub> scale and truncated to 50 and 1/50 for positive and negative odds respectively). Highlighted are clades highly enriched with positive odds for transfer.

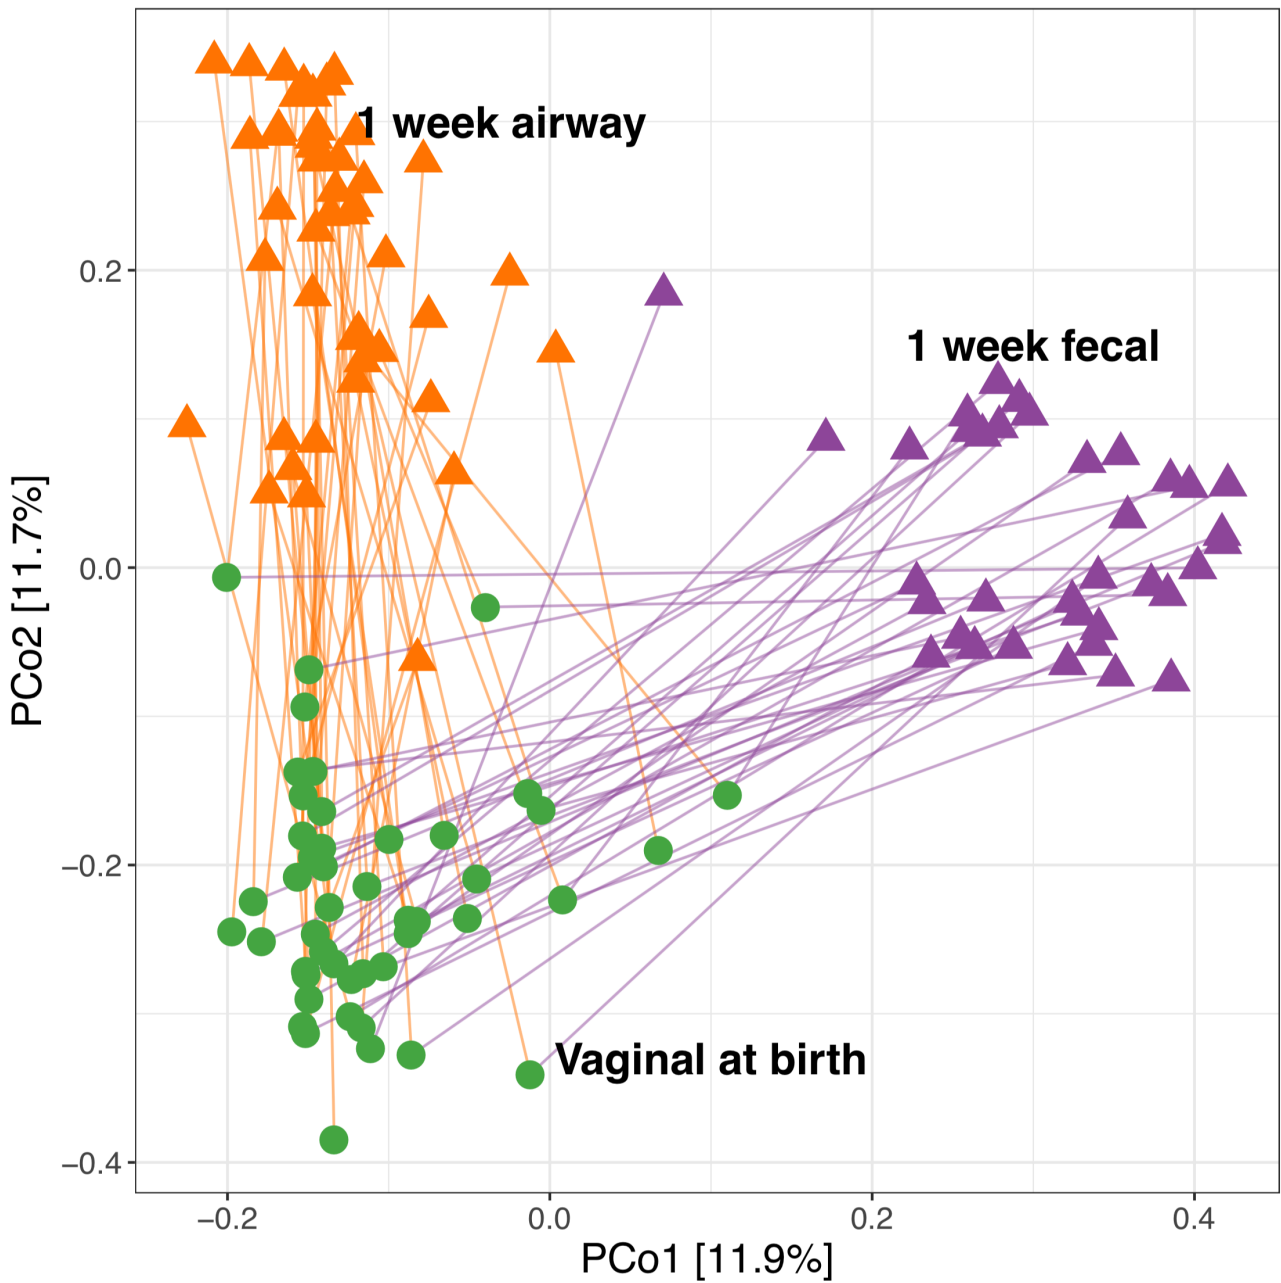

**Figure S11** - Ordination plot of binary comparison of microbiotas from vaginal samples at birth, 1-week fecal samples and 1-week airway samples. Connected within mother-child pairs.
